# Supplementary material
Source: MDPI journal article supplement (https://www.mdpi.com/2624-8549/5/2/91)

# Synthesis of abasic $\beta$ -diol-C-nucleosides

Maria Moccia,<sup>a</sup> Linda Piras,<sup>a</sup> Gea Bellini,<sup>b</sup> Michele Saviano<sup>a</sup> and Mauro F. A. Adamo<sup>b\*</sup>

- a) National Research Council-Institute of Crystallography, Department of Chemistry, via G. Amendola 122/O, 70126 Bari, Italy. E-mail: maria.moccia@cnr.it
- b) Centre for Synthesis and Chemical Biology (CSCB), Department of Pharmaceutical and Medicinal Chemistry, the Royal College of Surgeons in Ireland, 123 St. Stephen's Green, Dublin 2, Ireland, Fax: (+353) 1 4022168 E-mail: madamo@rcsi.ie.

Supporting information

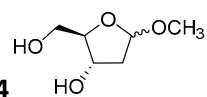

Figure S1: Compound 4

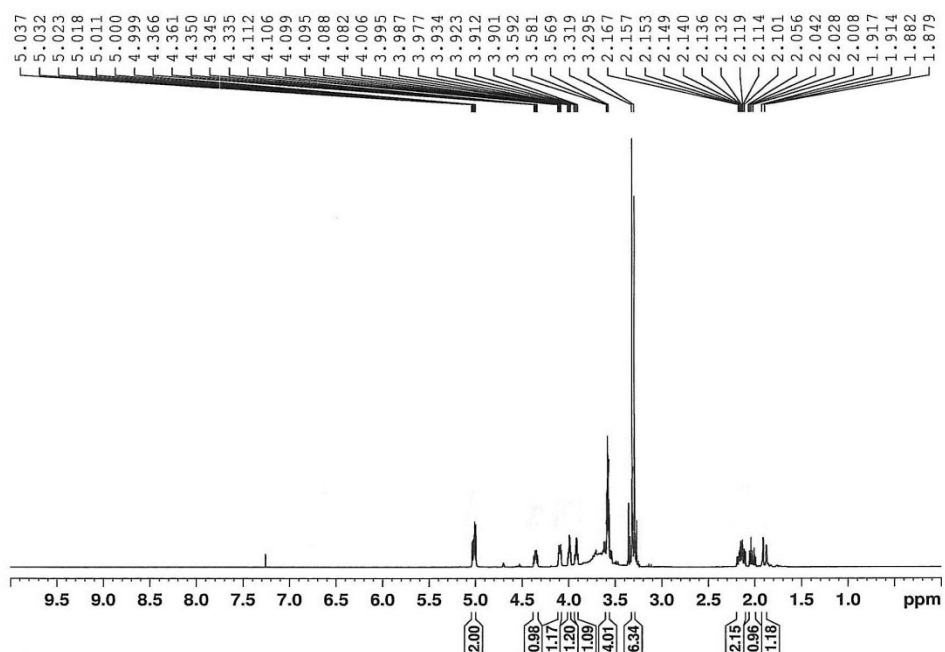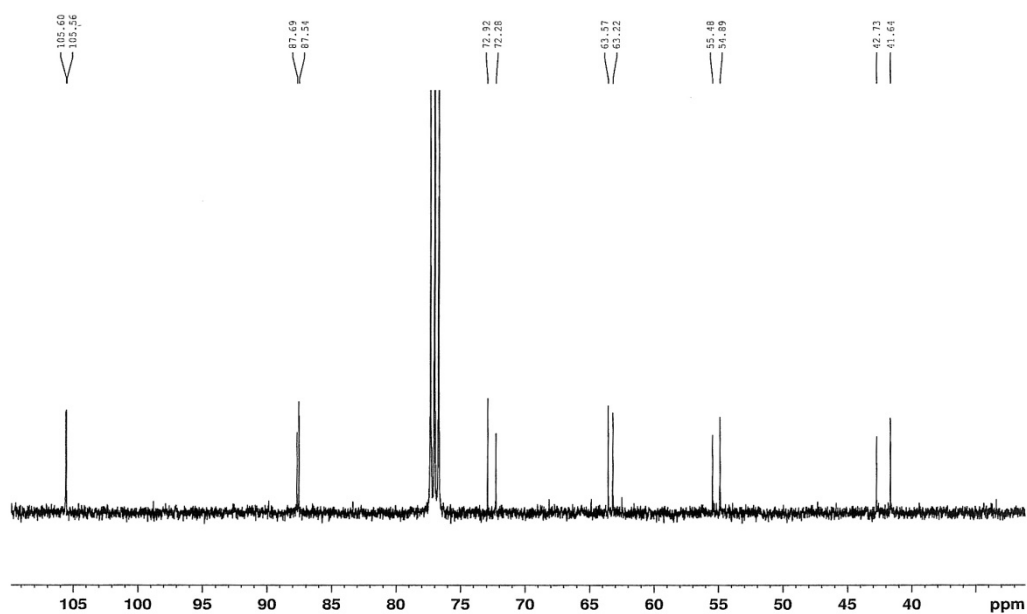

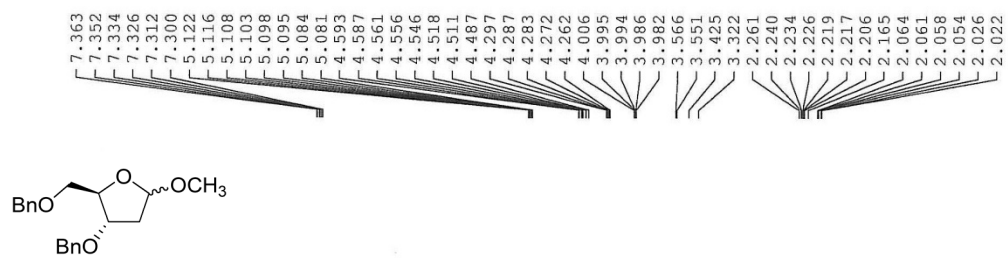

**Figure S2: compound 5**

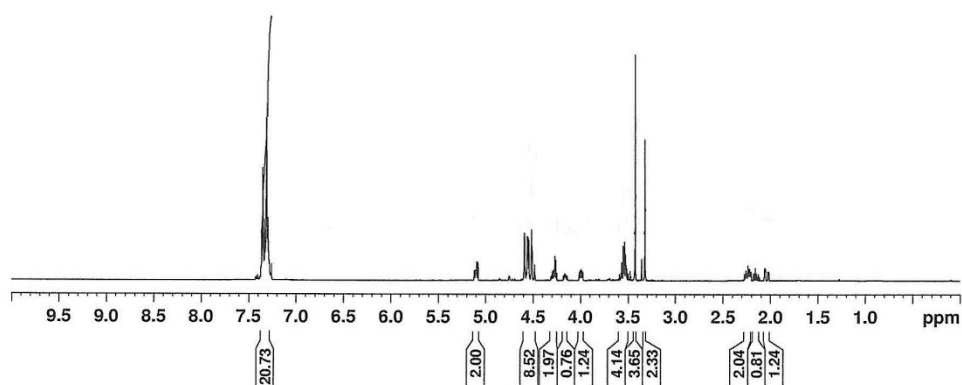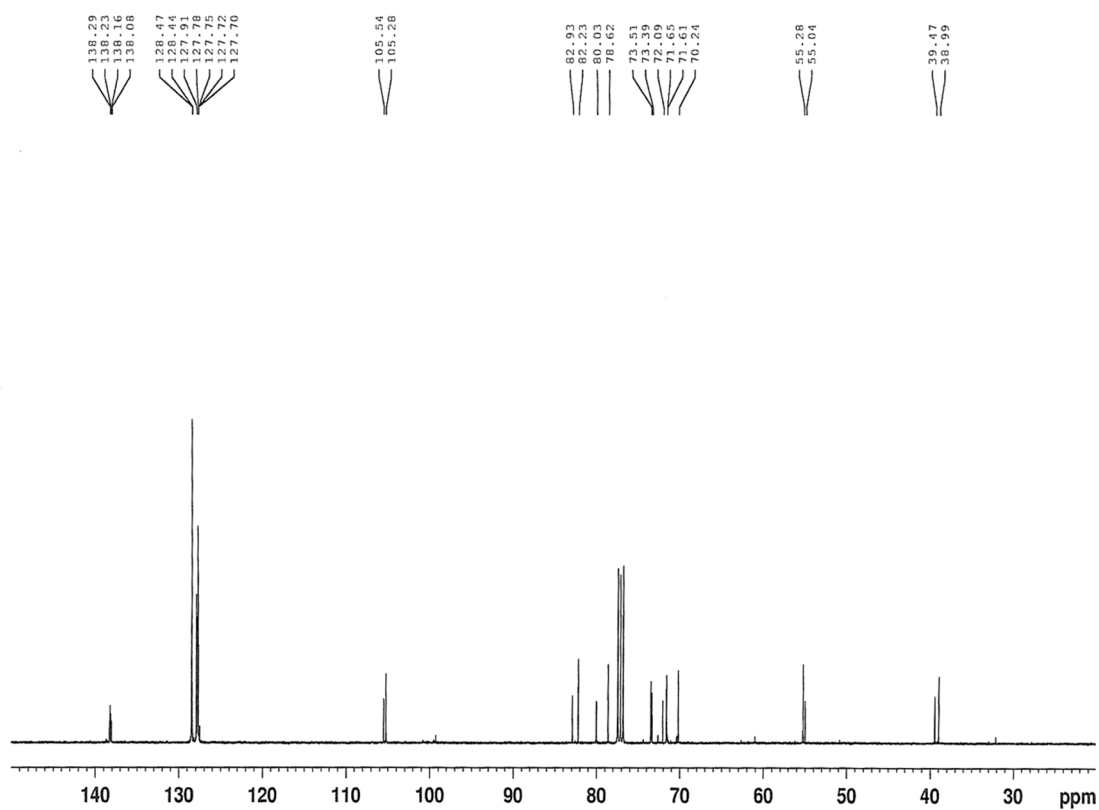

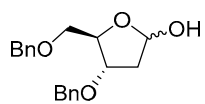

**Figure S3: compound 6**

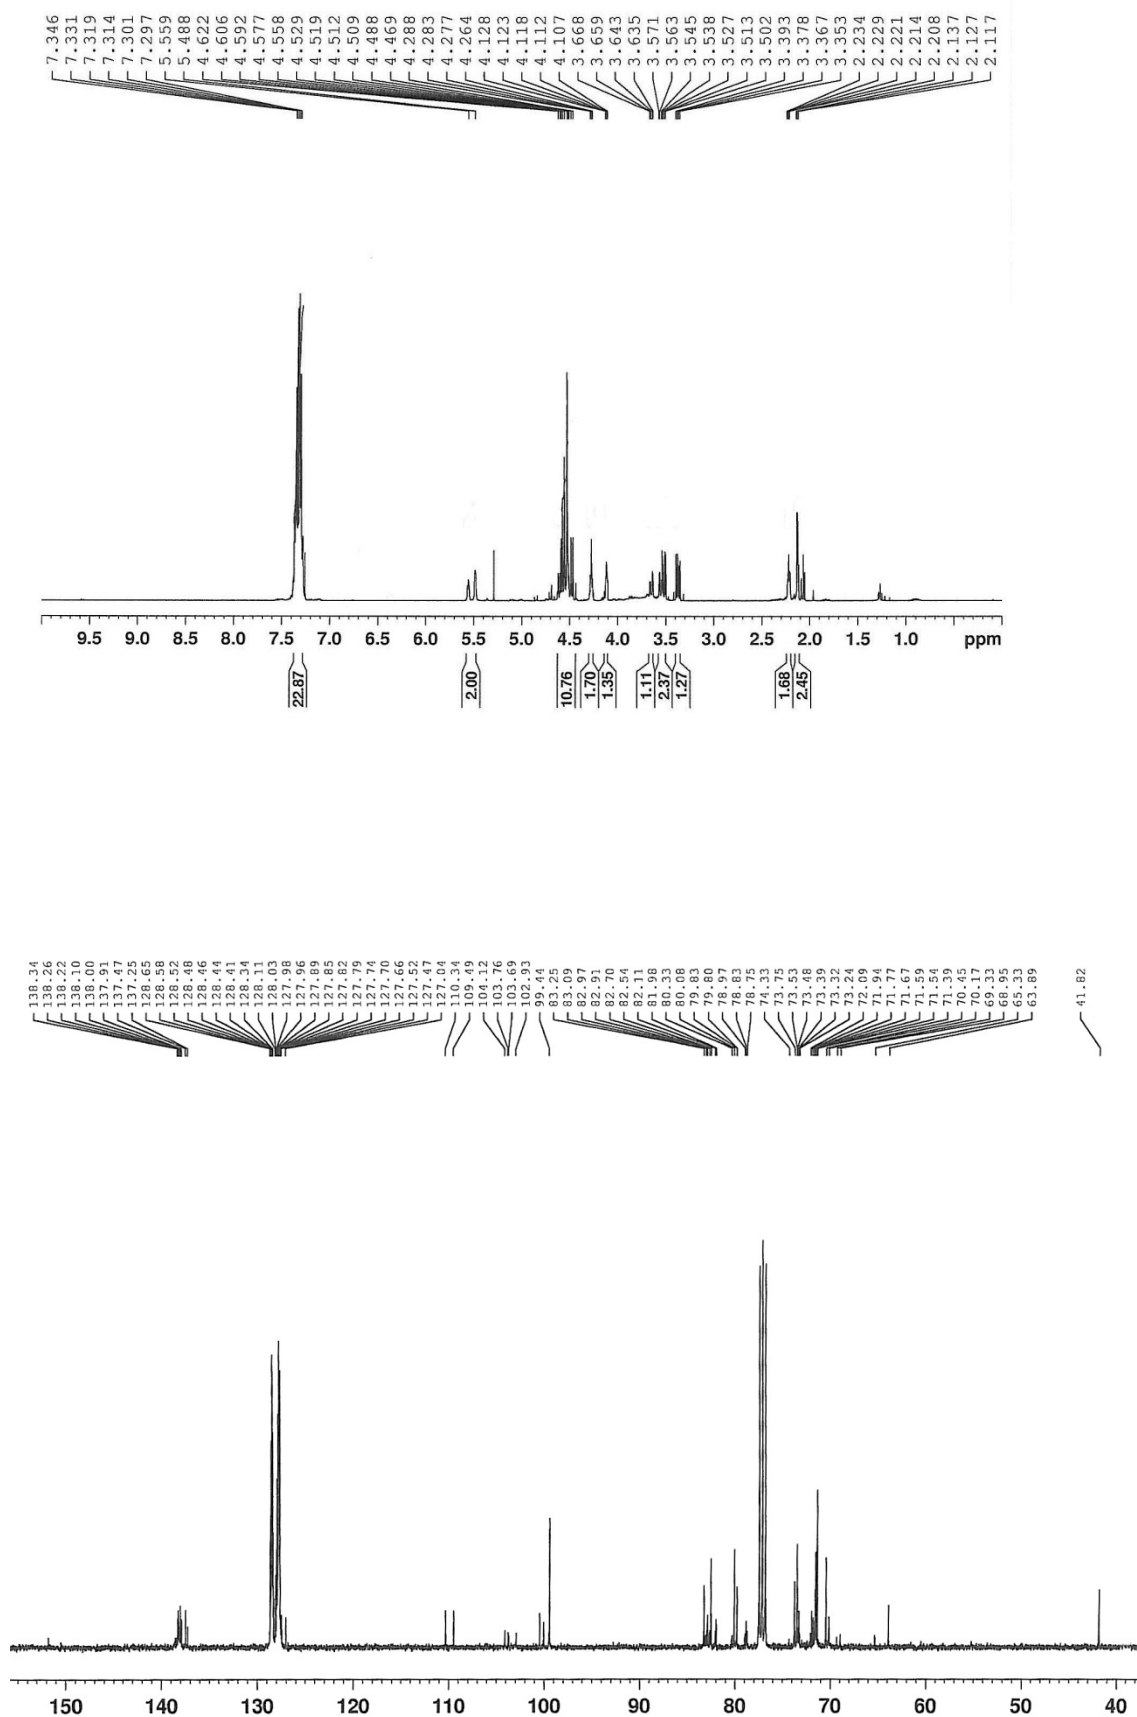

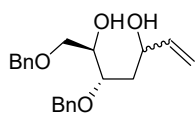

**Figure S4: compound 7**

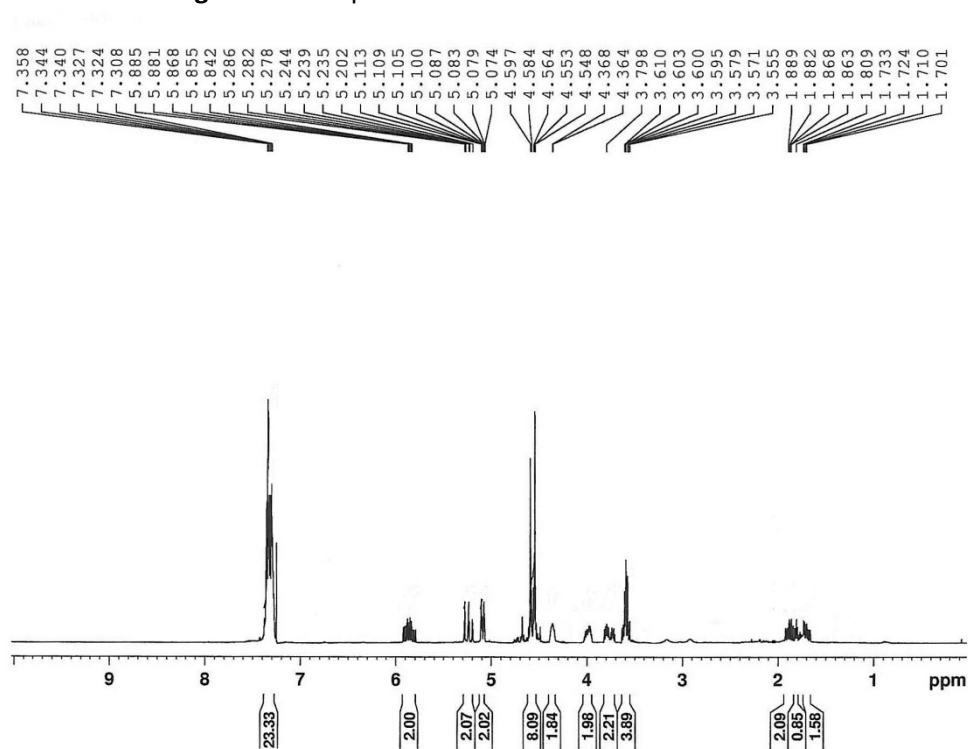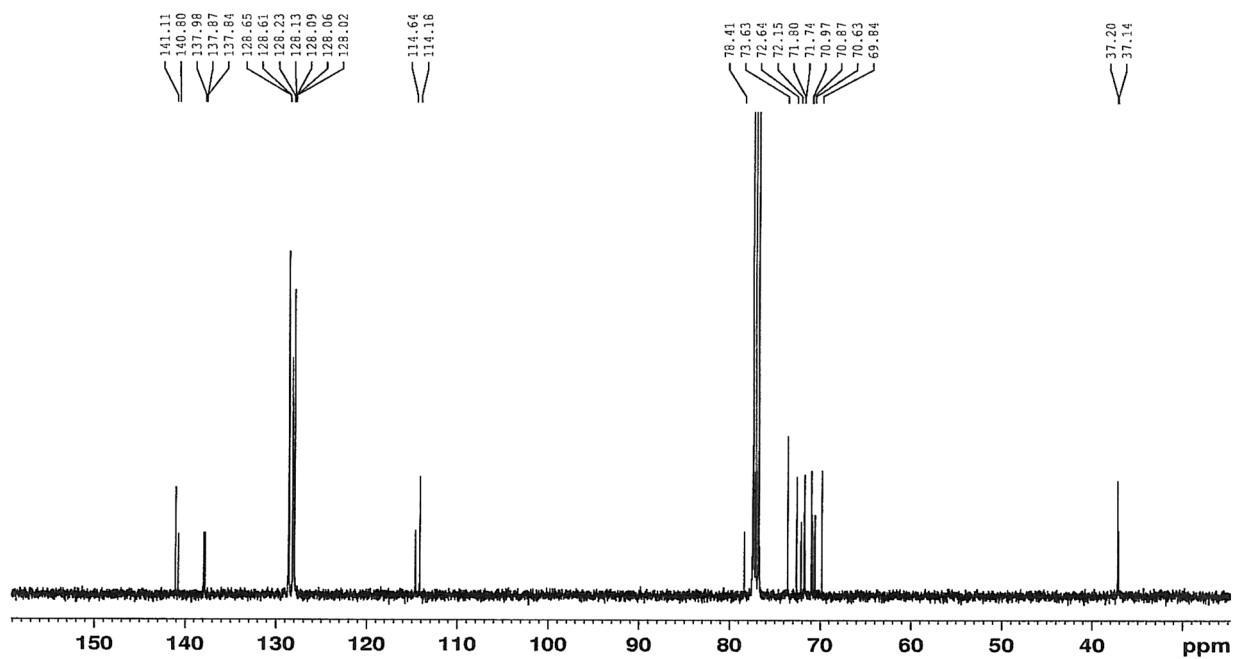

7.340  
7.324  
7.322  
7.307  
7.292  
5.975  
5.253  
5.251  
5.247  
5.210  
5.208  
5.110  
5.108  
5.104  
5.085  
5.083  
5.081  
4.651  
4.621  
4.586  
4.580  
4.556  
4.552  
4.522  
4.426  
4.396  
4.352  
4.334  
4.170  
4.161  
4.158  
4.154  
4.149  
4.146  
4.143  
4.054  
4.042  
4.038  
4.030  
4.026  
3.859  
3.847  
3.834  
3.822  
3.768  
3.752  
3.743  
2.331  
2.312  
2.297  
1.915  
1.907  
1.898

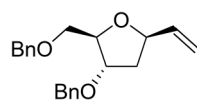

Figure S5: Compound 8β

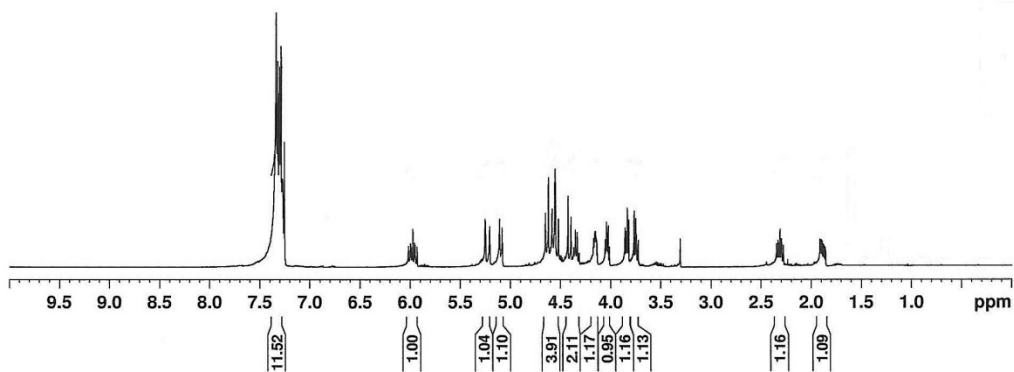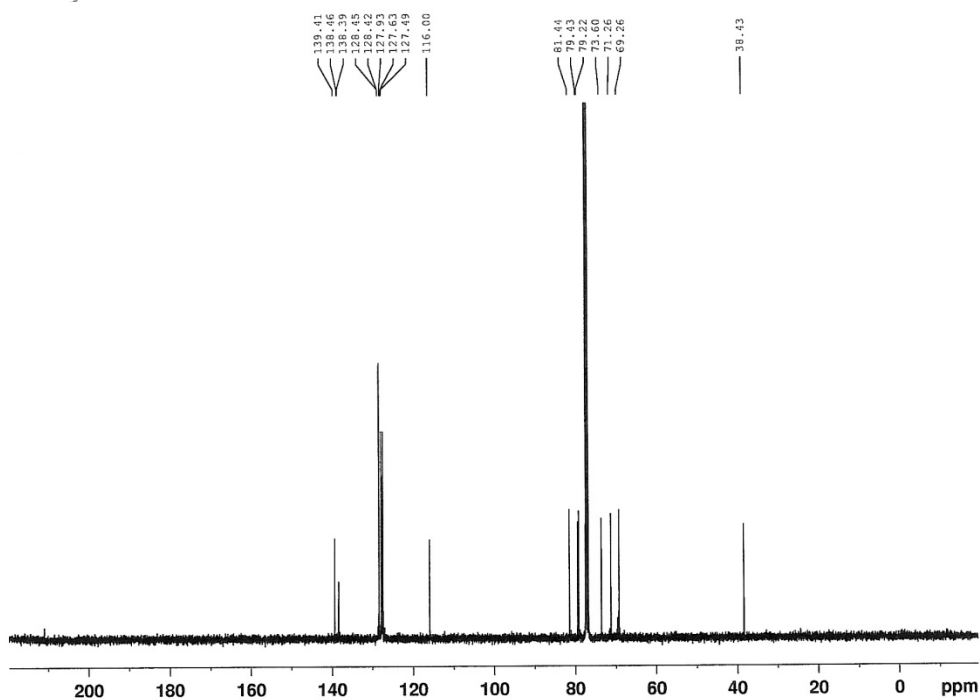

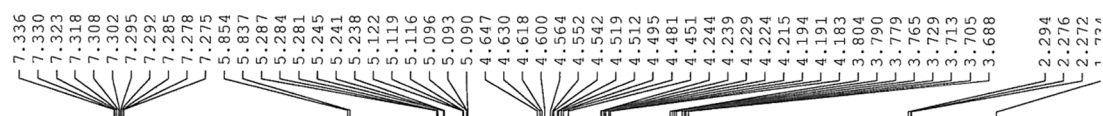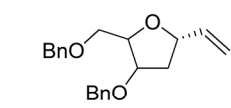

**Figure S6: Compound 8α**

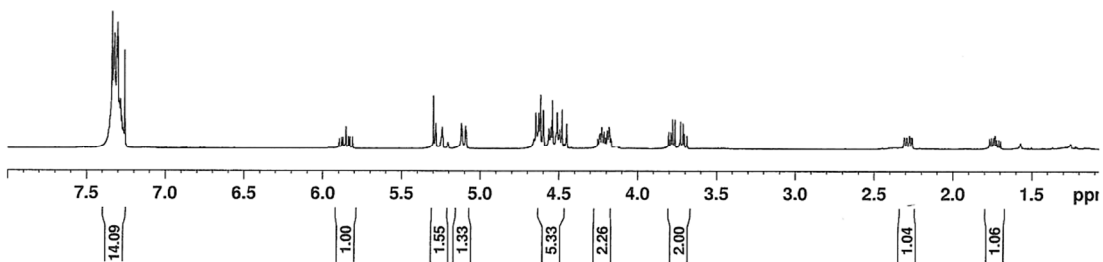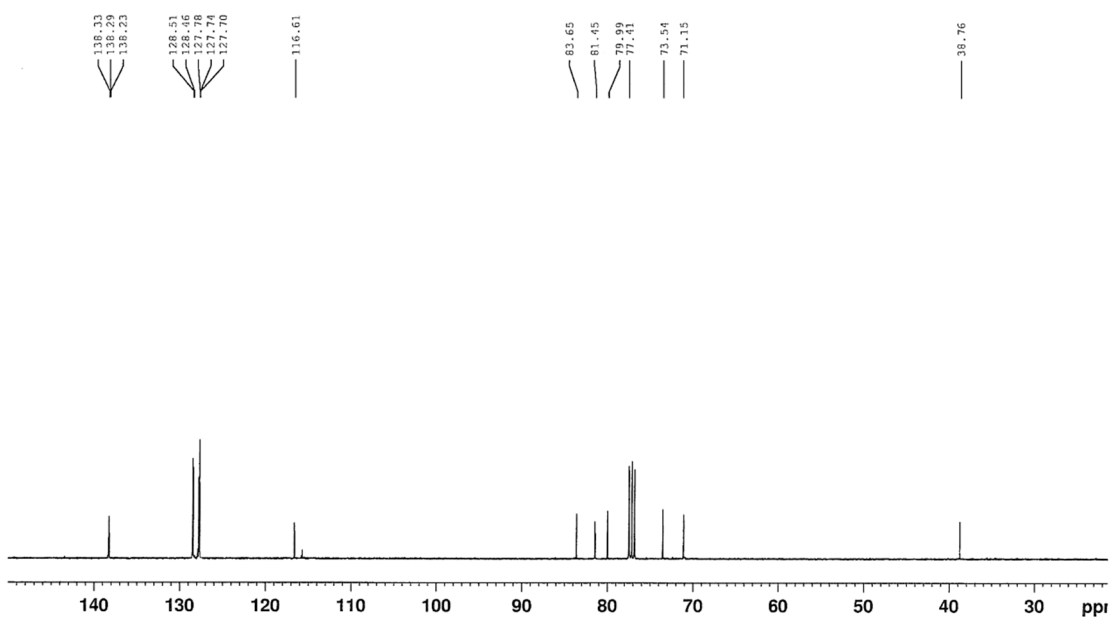

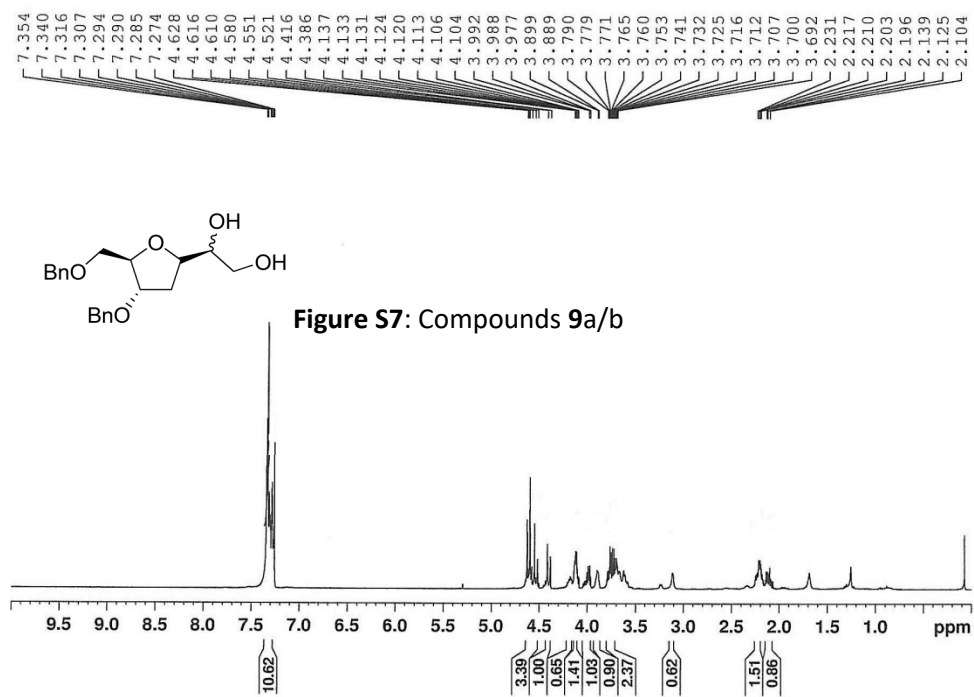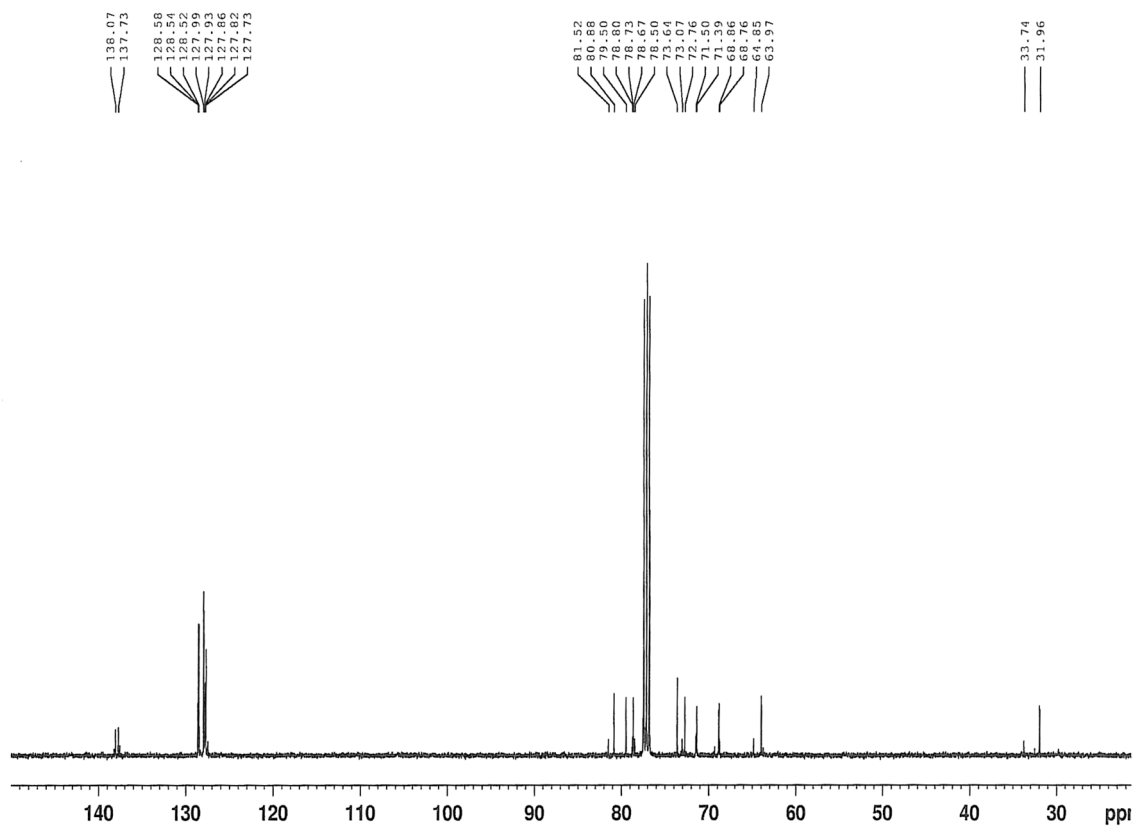



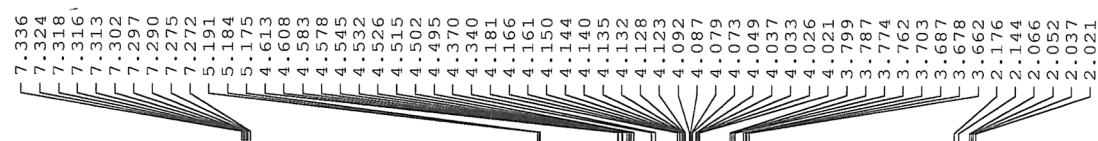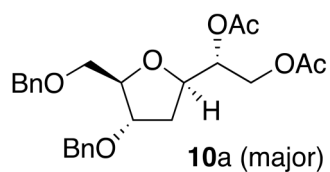

**Figure S8: Compound 10a**

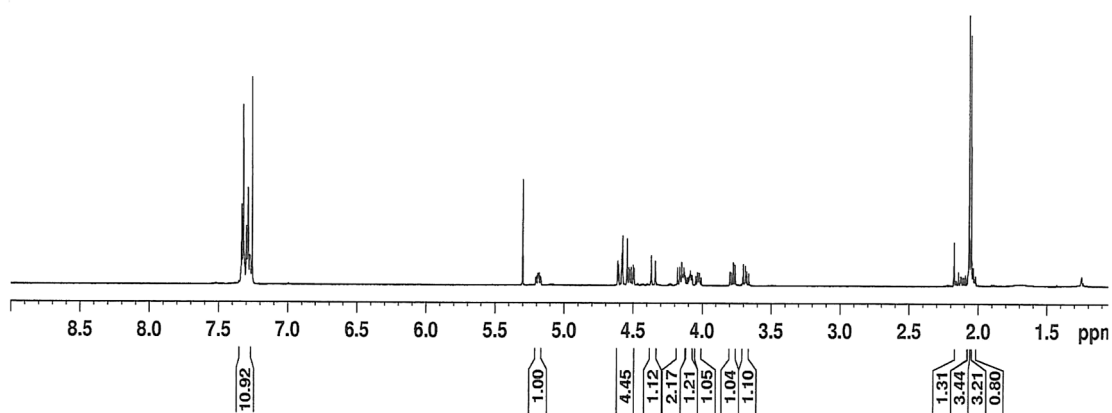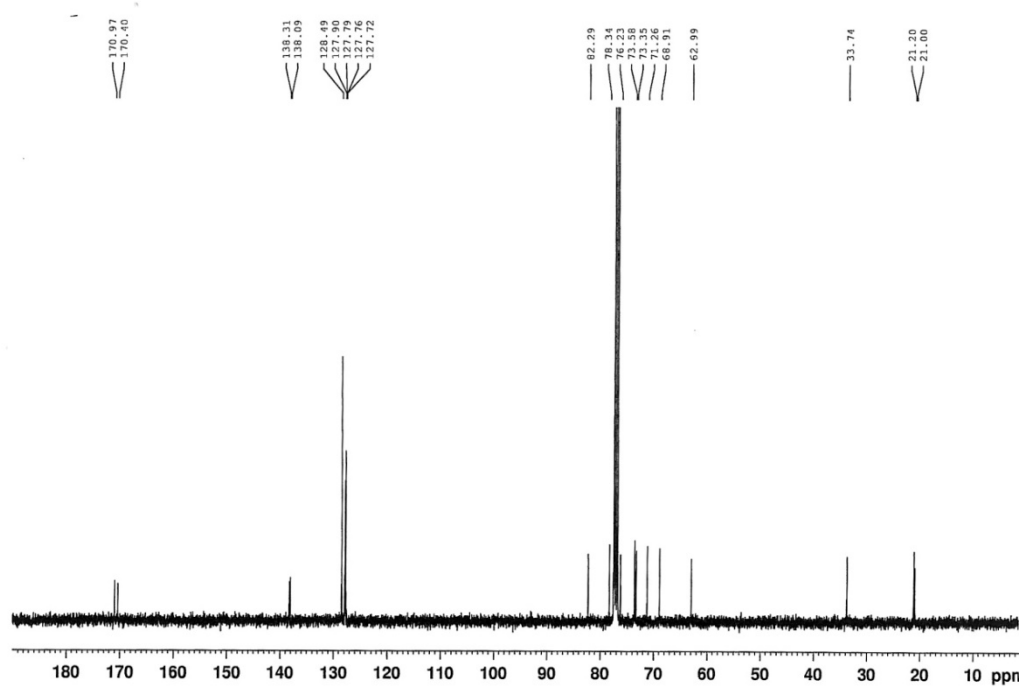

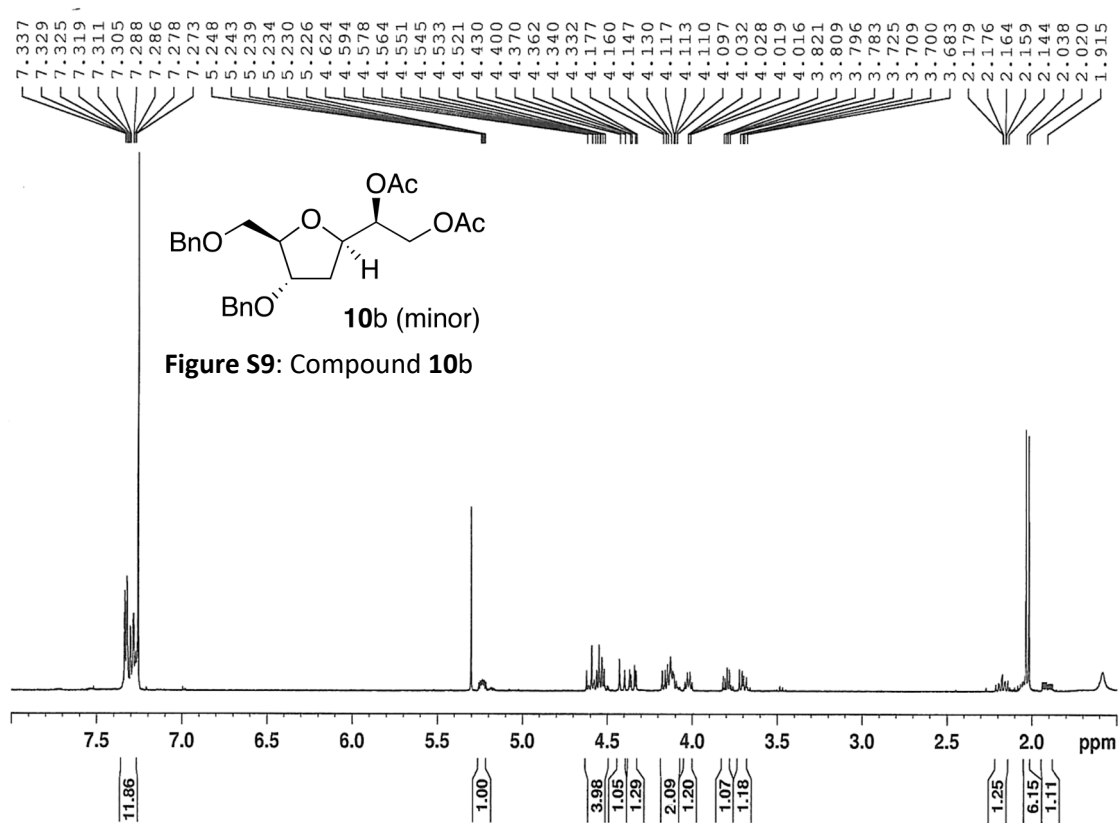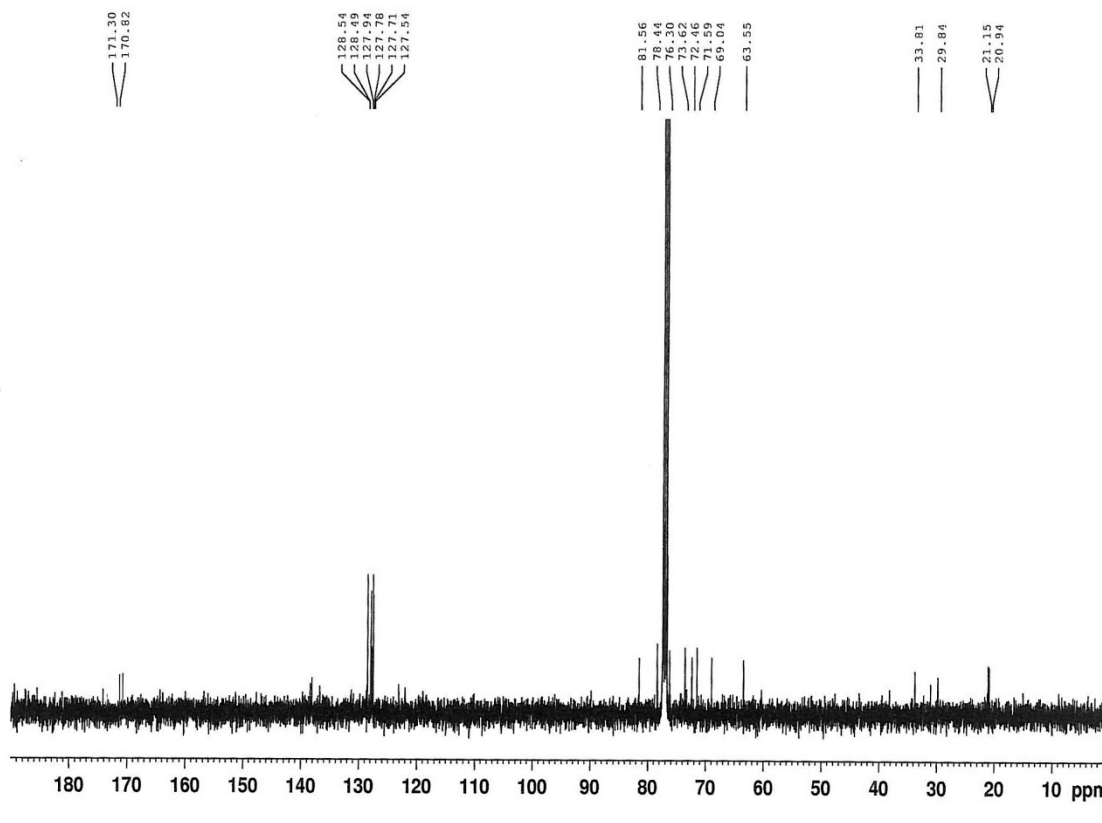

Chemical structure of compound **12a** is shown. The structure is a bicyclic acetal derivative of a 1,3-diol and a ketone, with two benzyl (BnO) groups and a 3-phenylpropyl group attached to the ring system.

<sup>1</sup>H NMR spectrum (CDCl<sub>3</sub>) of compound **12a** is displayed. The x-axis represents the chemical shift in ppm, ranging from 1.6 to 8.6. The spectrum shows several multiplets and singlets, with integration values provided below the peaks.

Integration values (from left to right): 2.01, 1.15, 2.20, 0.45, 5.31, 4.26, 6.62, 1.00, 3.81, 2.07, 2.51, 1.76, 2.23, 0.99, 1.33, 1.44, 1.95, 0.60, 0.83.

Chemical shift values (from left to right): 8.539, 8.435, 7.940, 7.920, 7.438, 7.434, 7.422, 7.418, 7.412, 7.400, 7.396, 7.392, 7.389, 7.376, 7.372, 7.355, 7.321, 7.305, 7.287, 7.281, 7.263, 7.253, 7.239, 7.234, 7.226, 7.220, 7.191, 7.051, 5.231, 4.612, 4.582, 4.549, 4.543, 4.519, 4.417, 4.406, 4.402, 4.388, 4.357, 4.350, 4.332, 4.320, 4.263, 4.238, 4.093, 4.084, 4.072, 3.838, 3.813, 3.751, 3.736, 2.199, 2.187, 2.104, 1.631, 1.608.

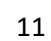

**Figure S11: Compound 12b**

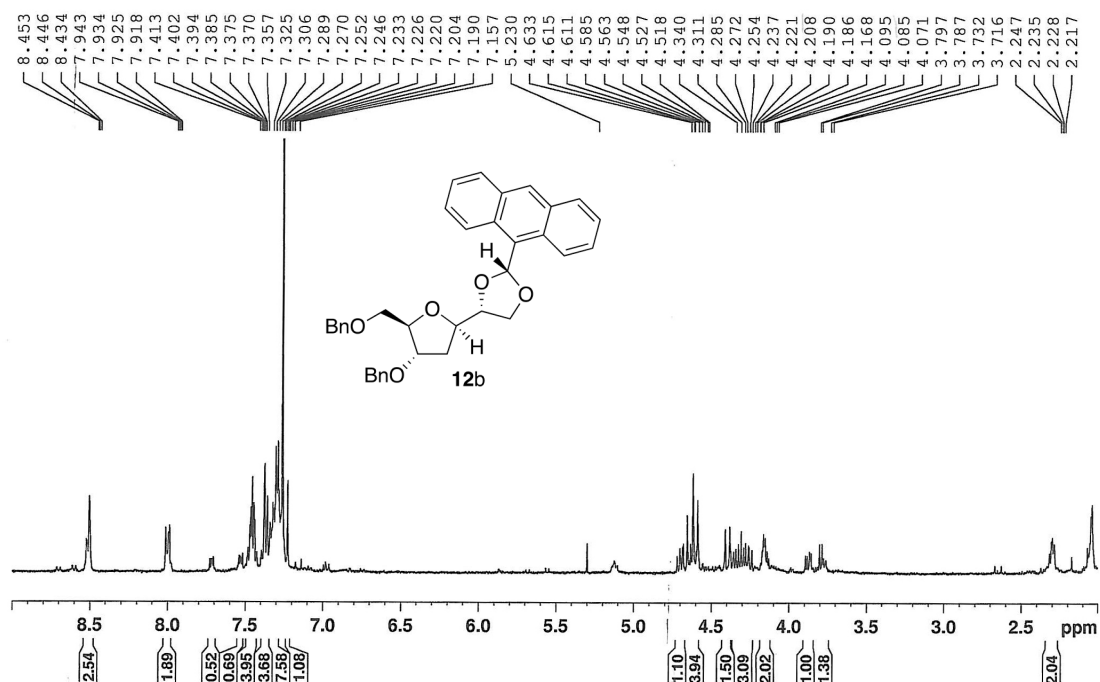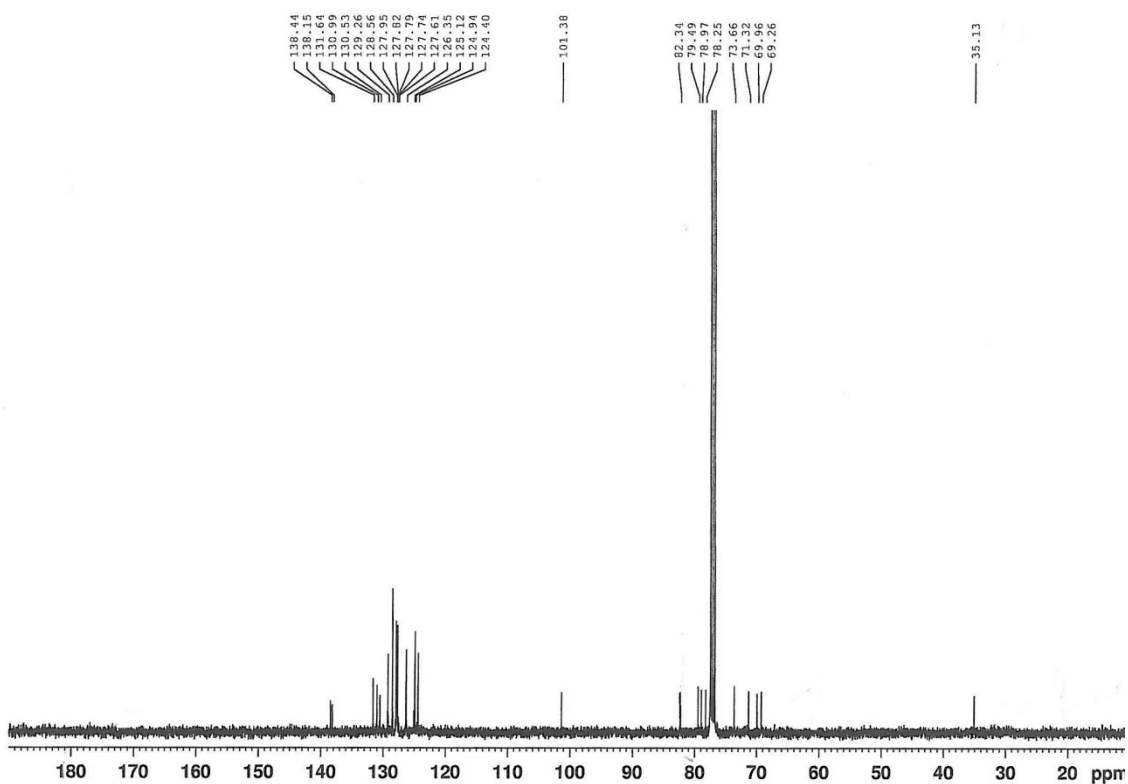

**Figure S12: Compound 13**

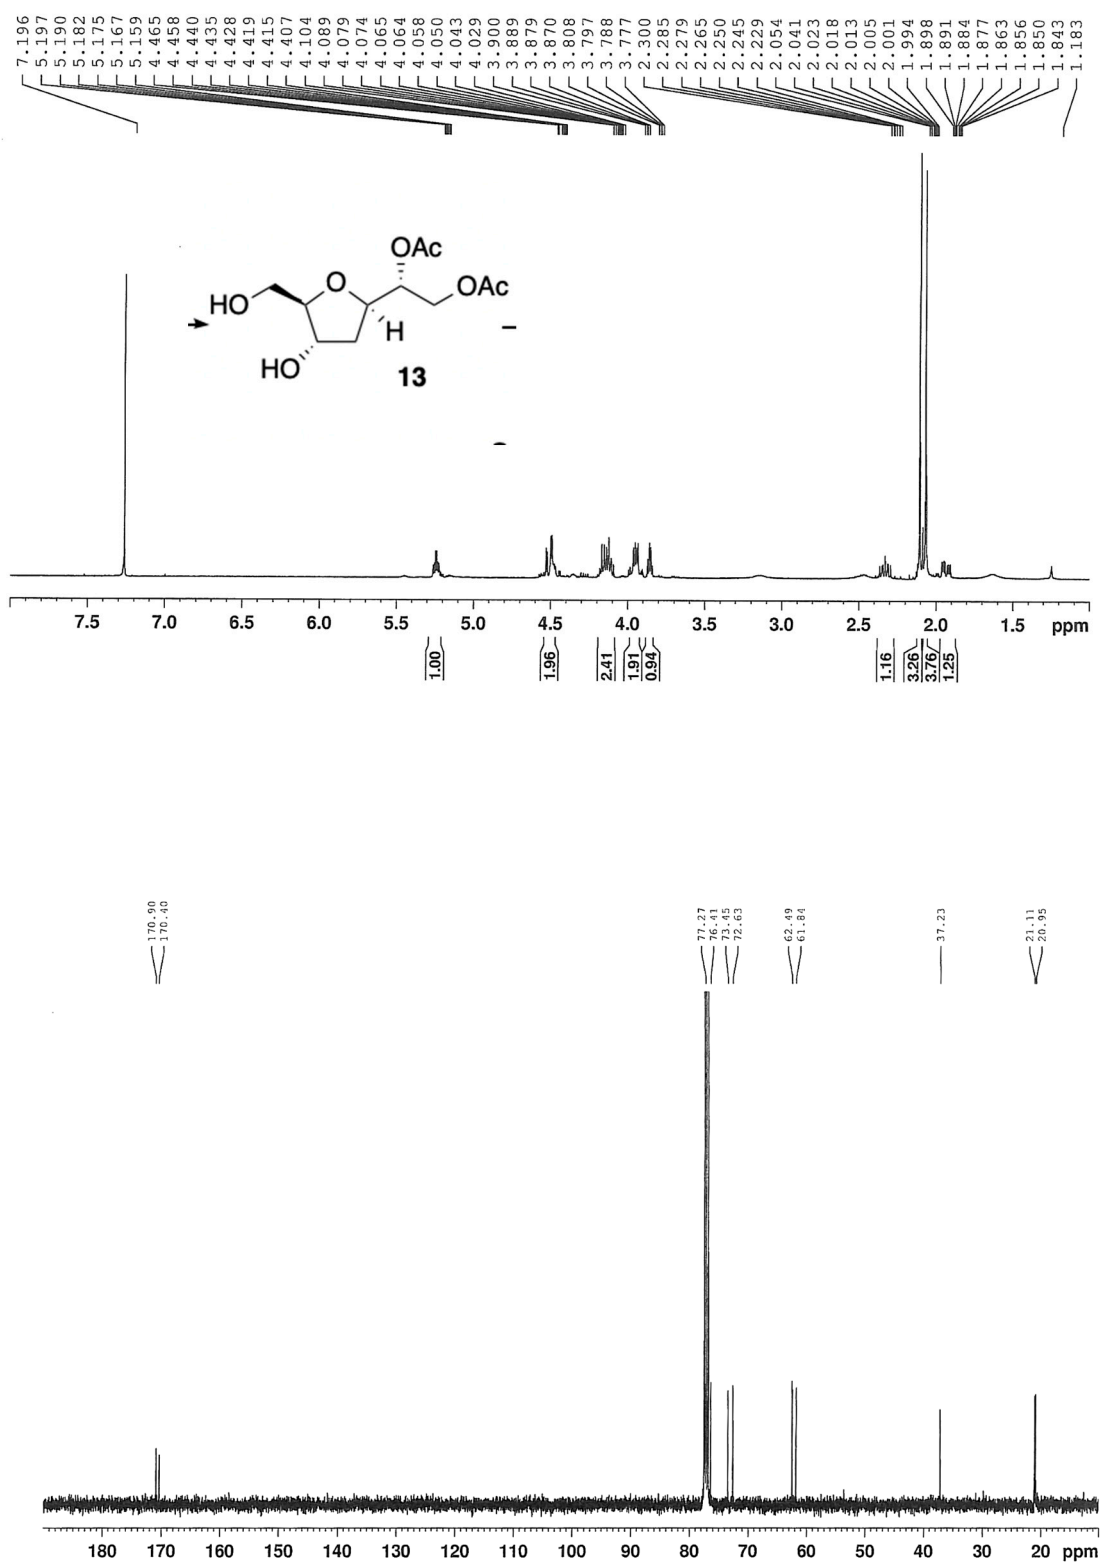

**Figure S13: Compound 14**

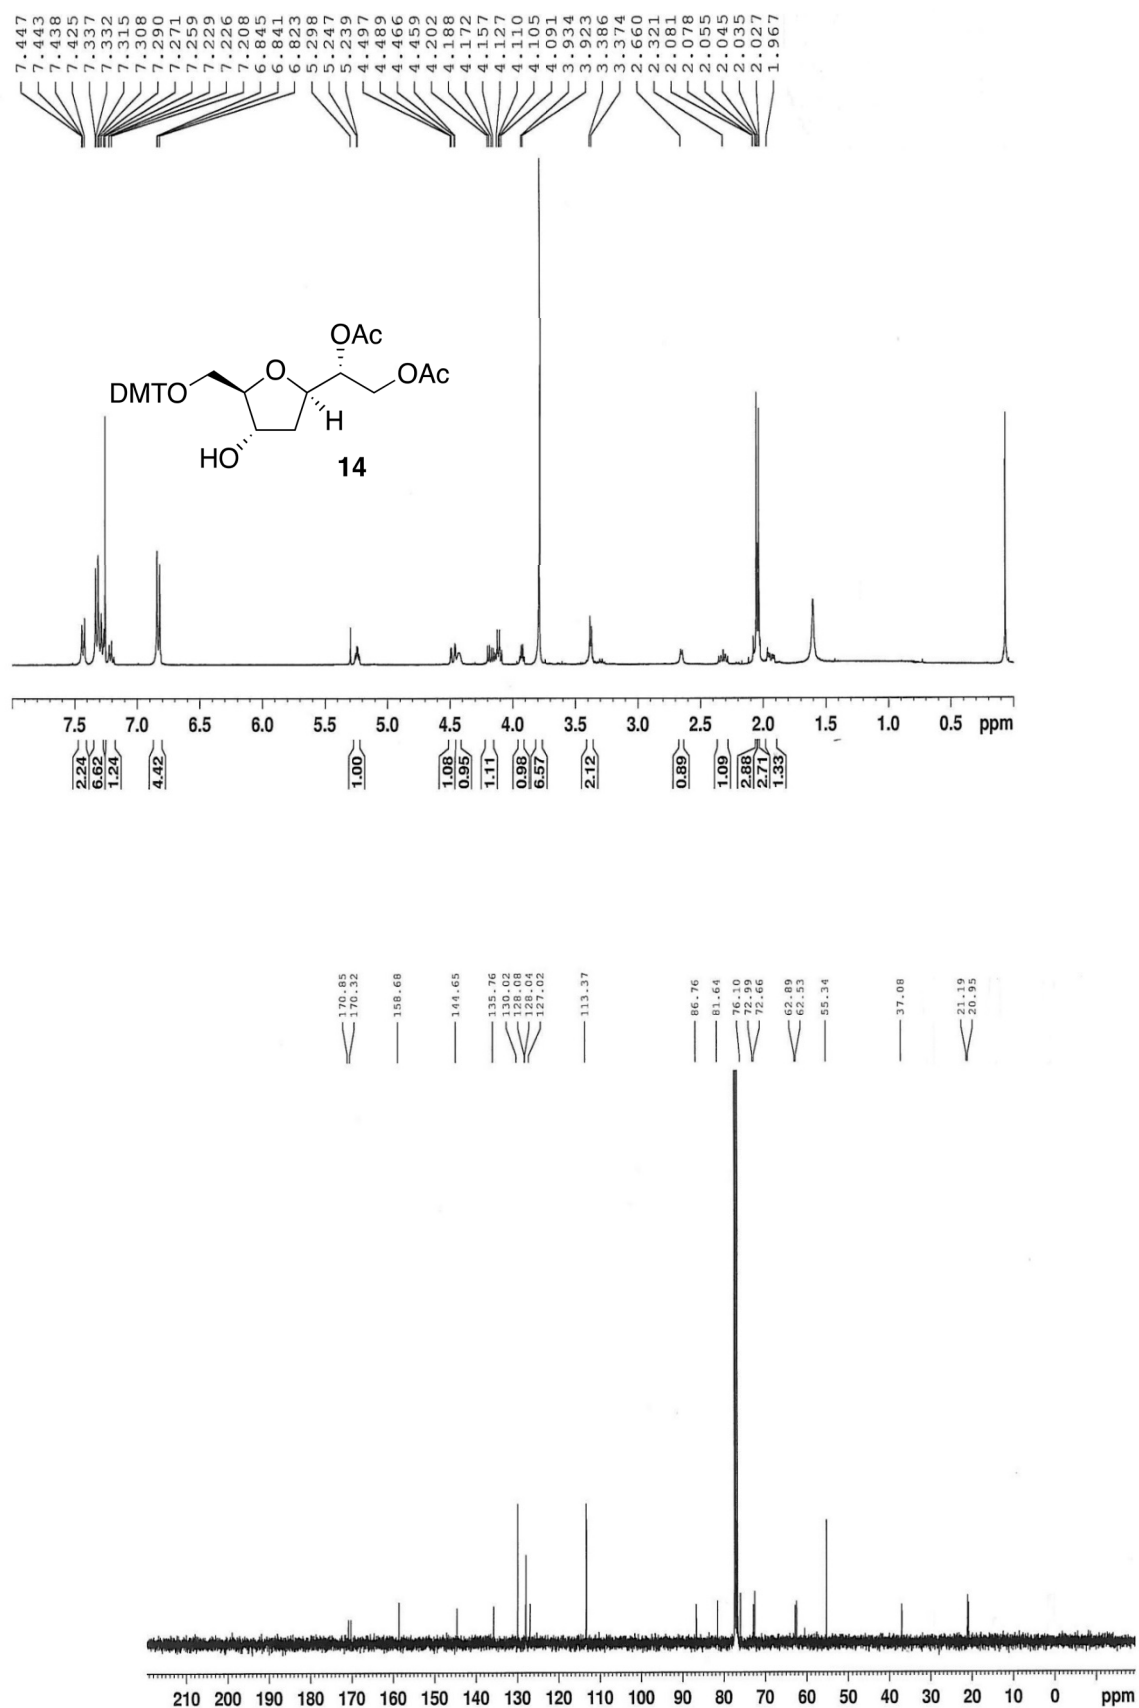

Figure S14: Compound 15

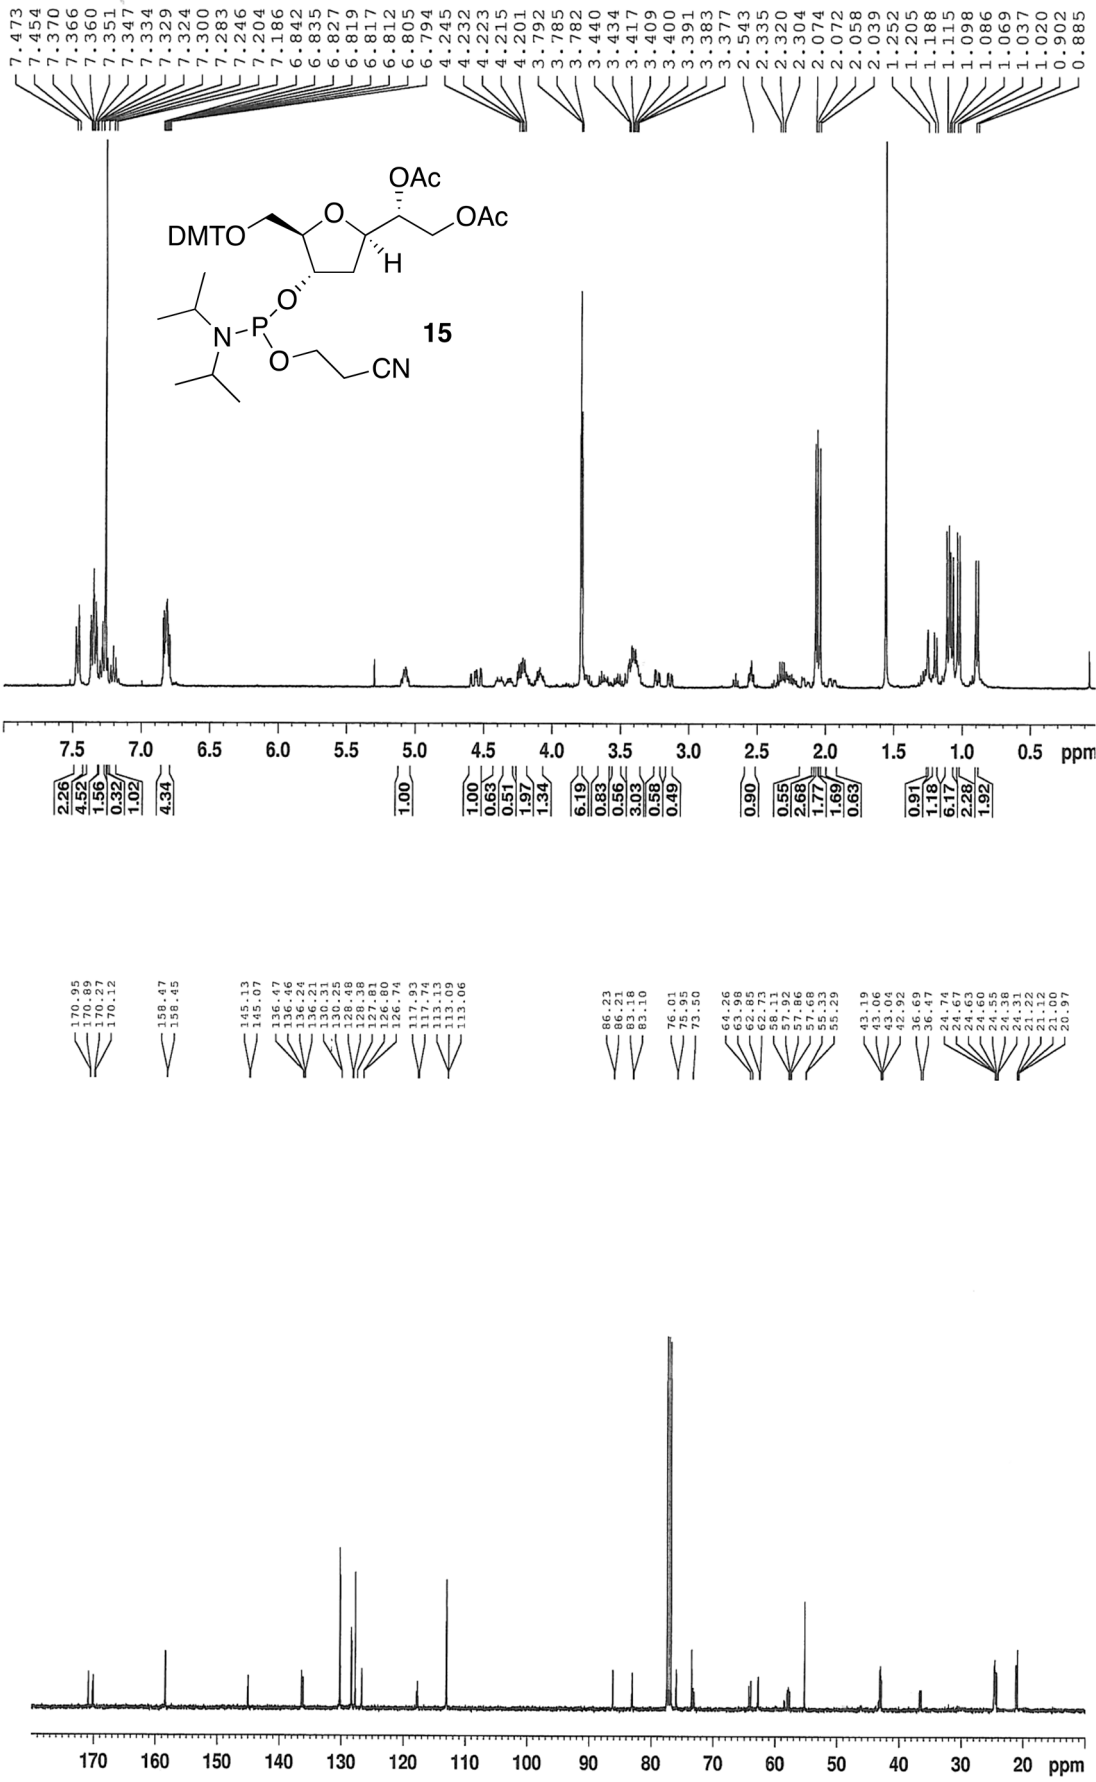

**Figure S15: Compound 16**

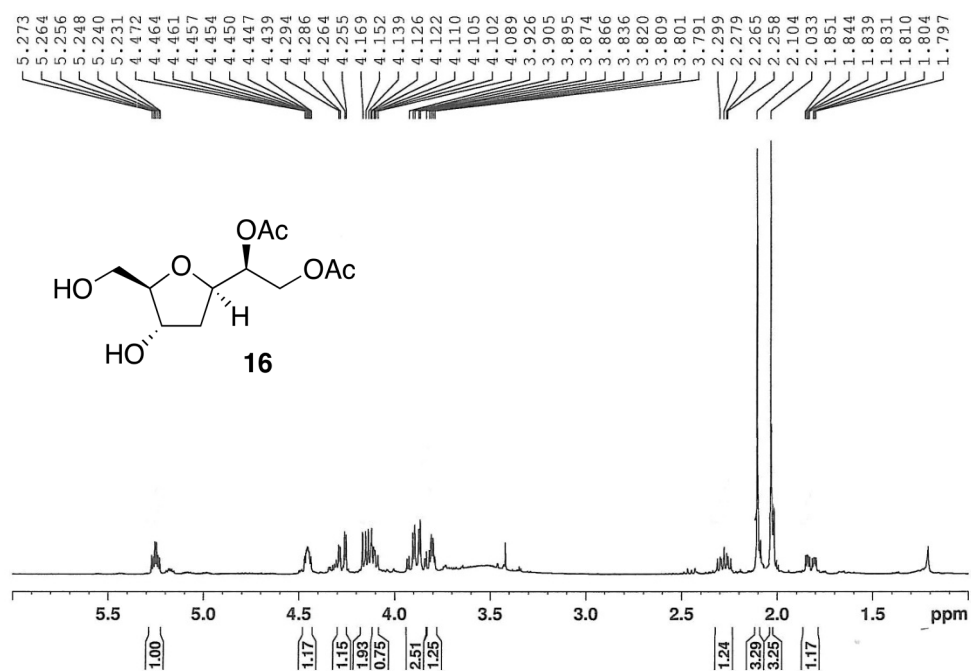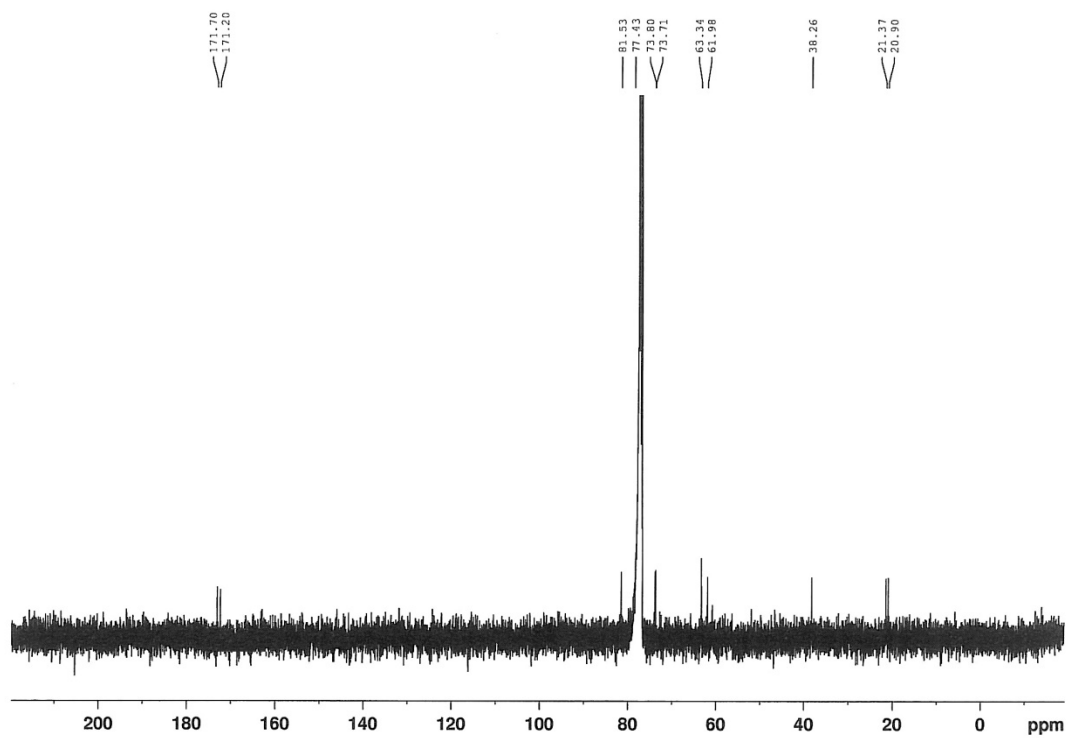



**Figure S16: Compound 17**

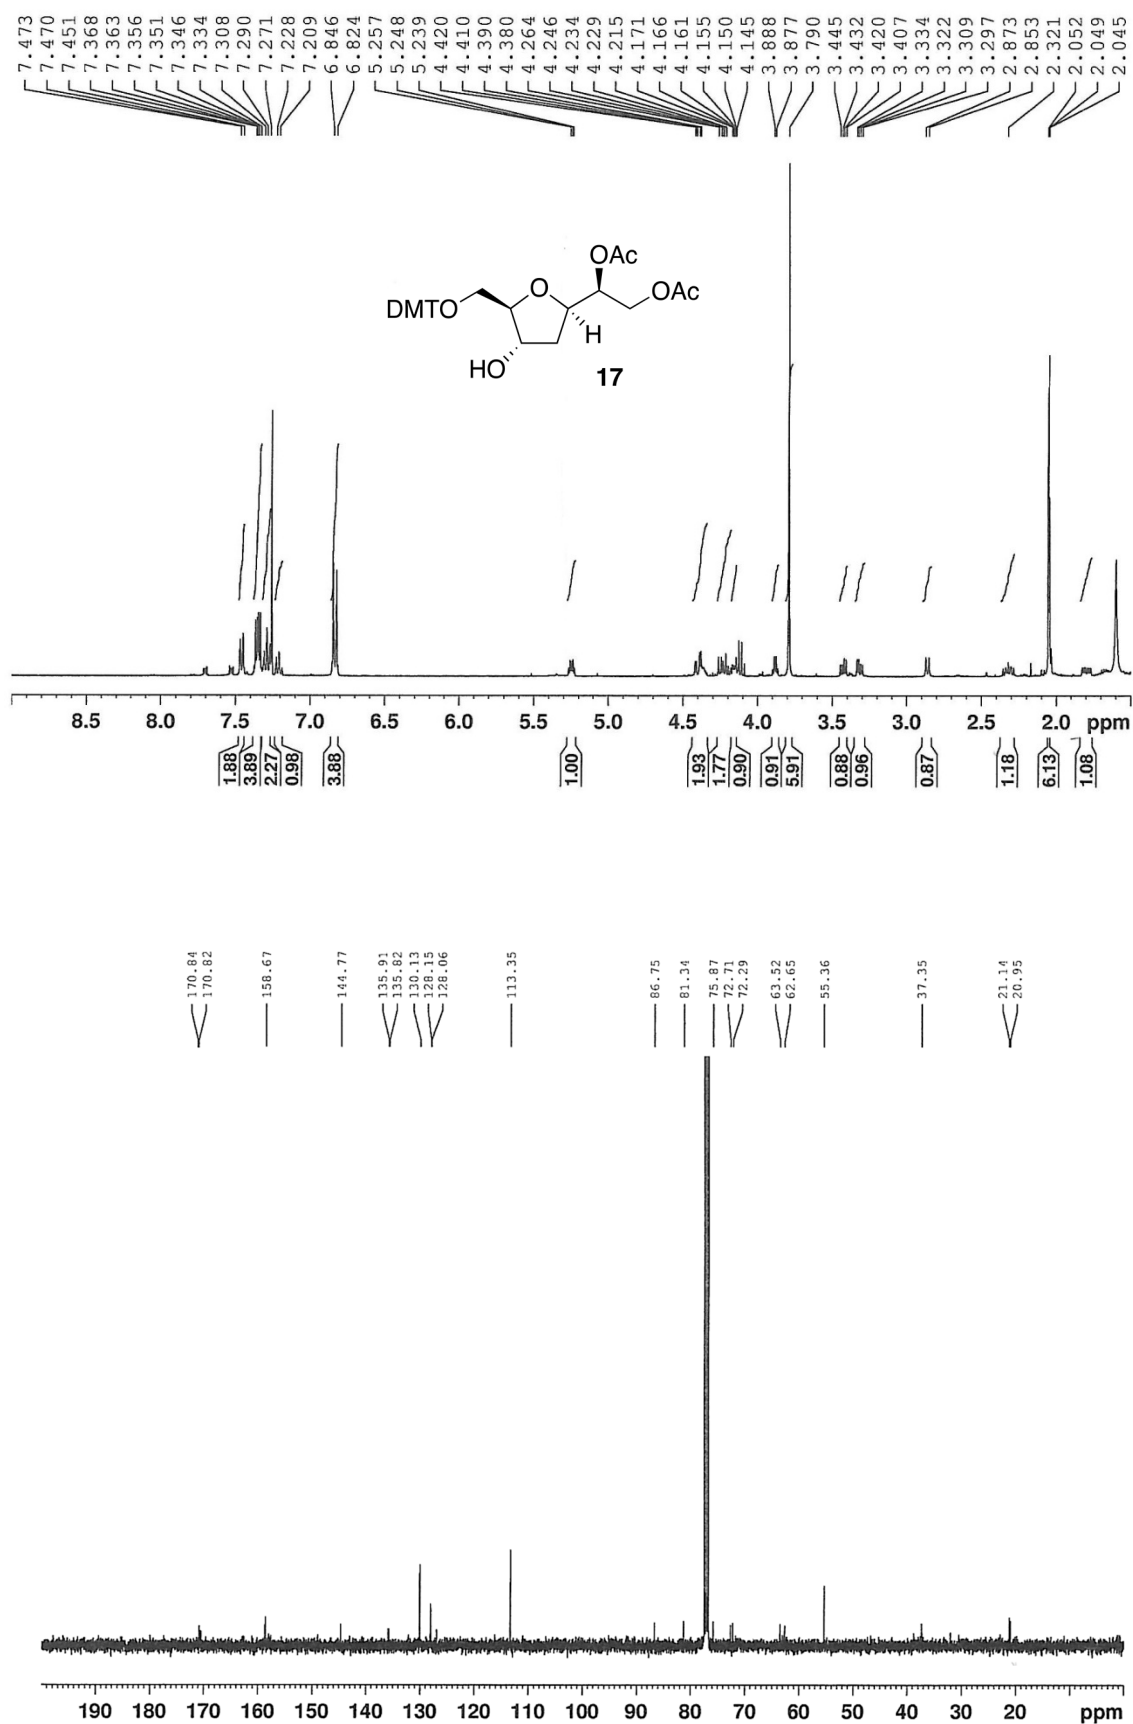

**Figure S17: Compound 18**

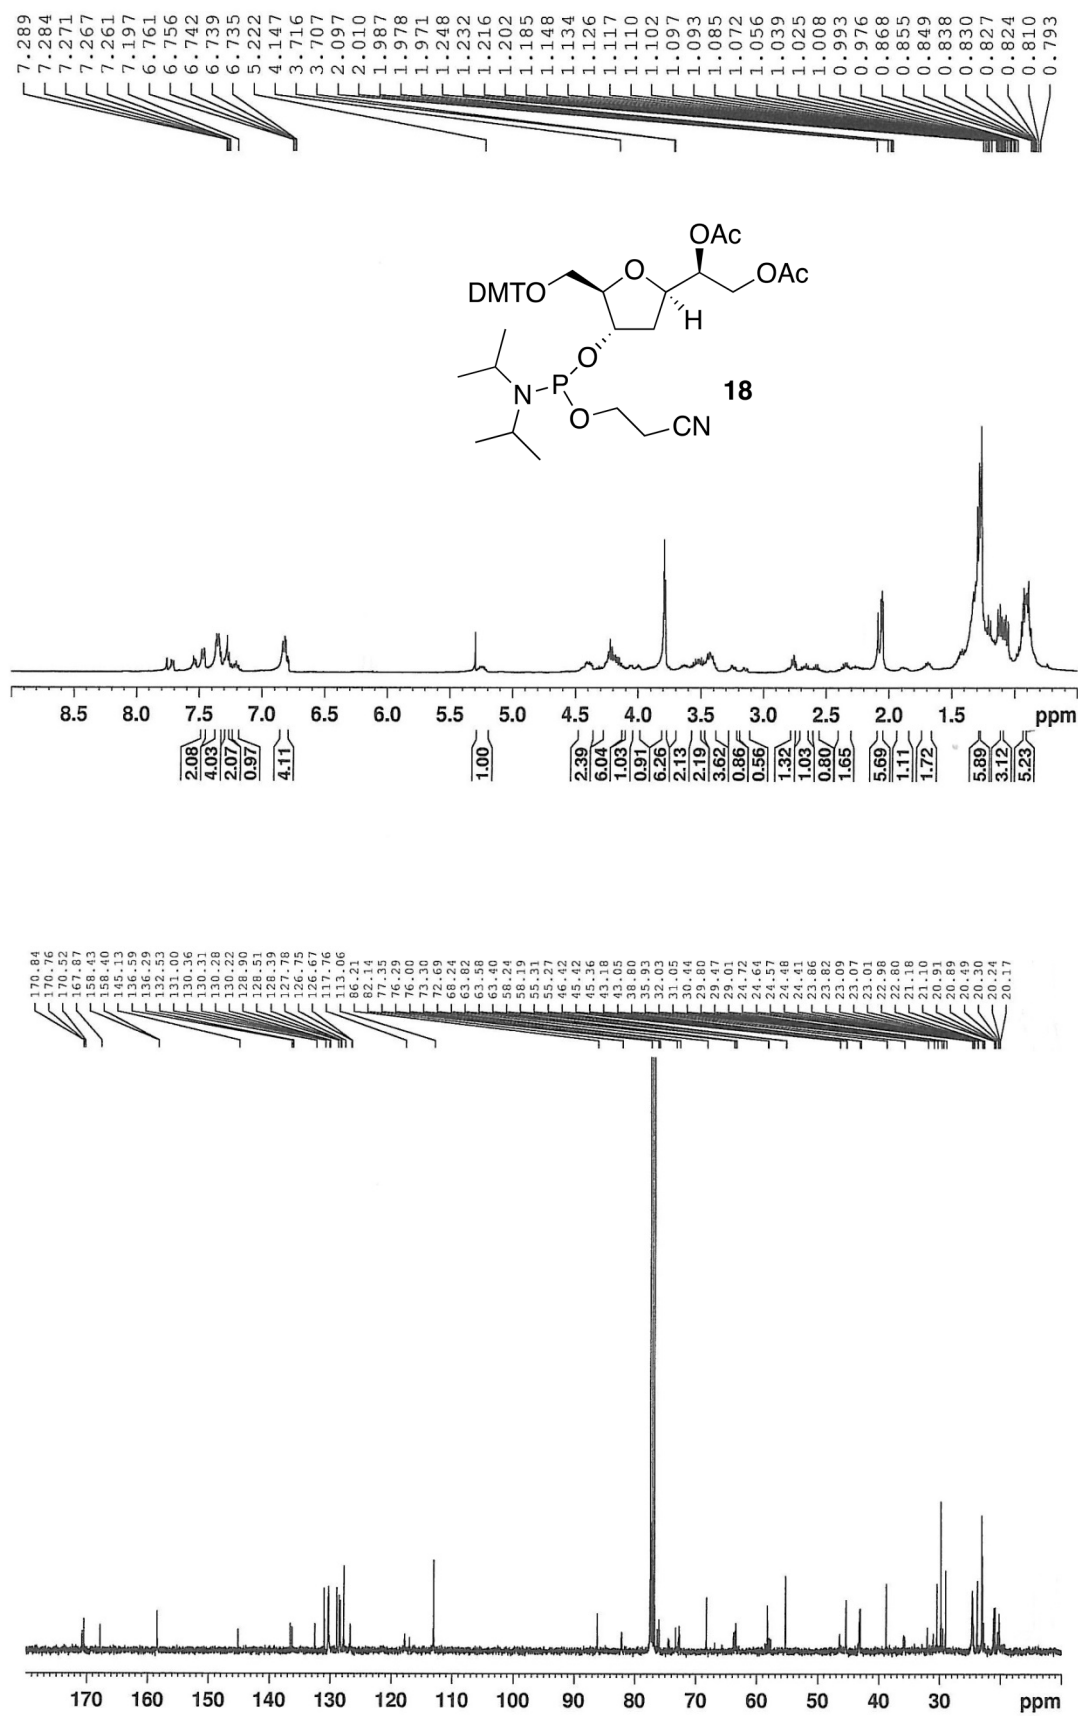

Figure S18: Mass Spec of oligomer A

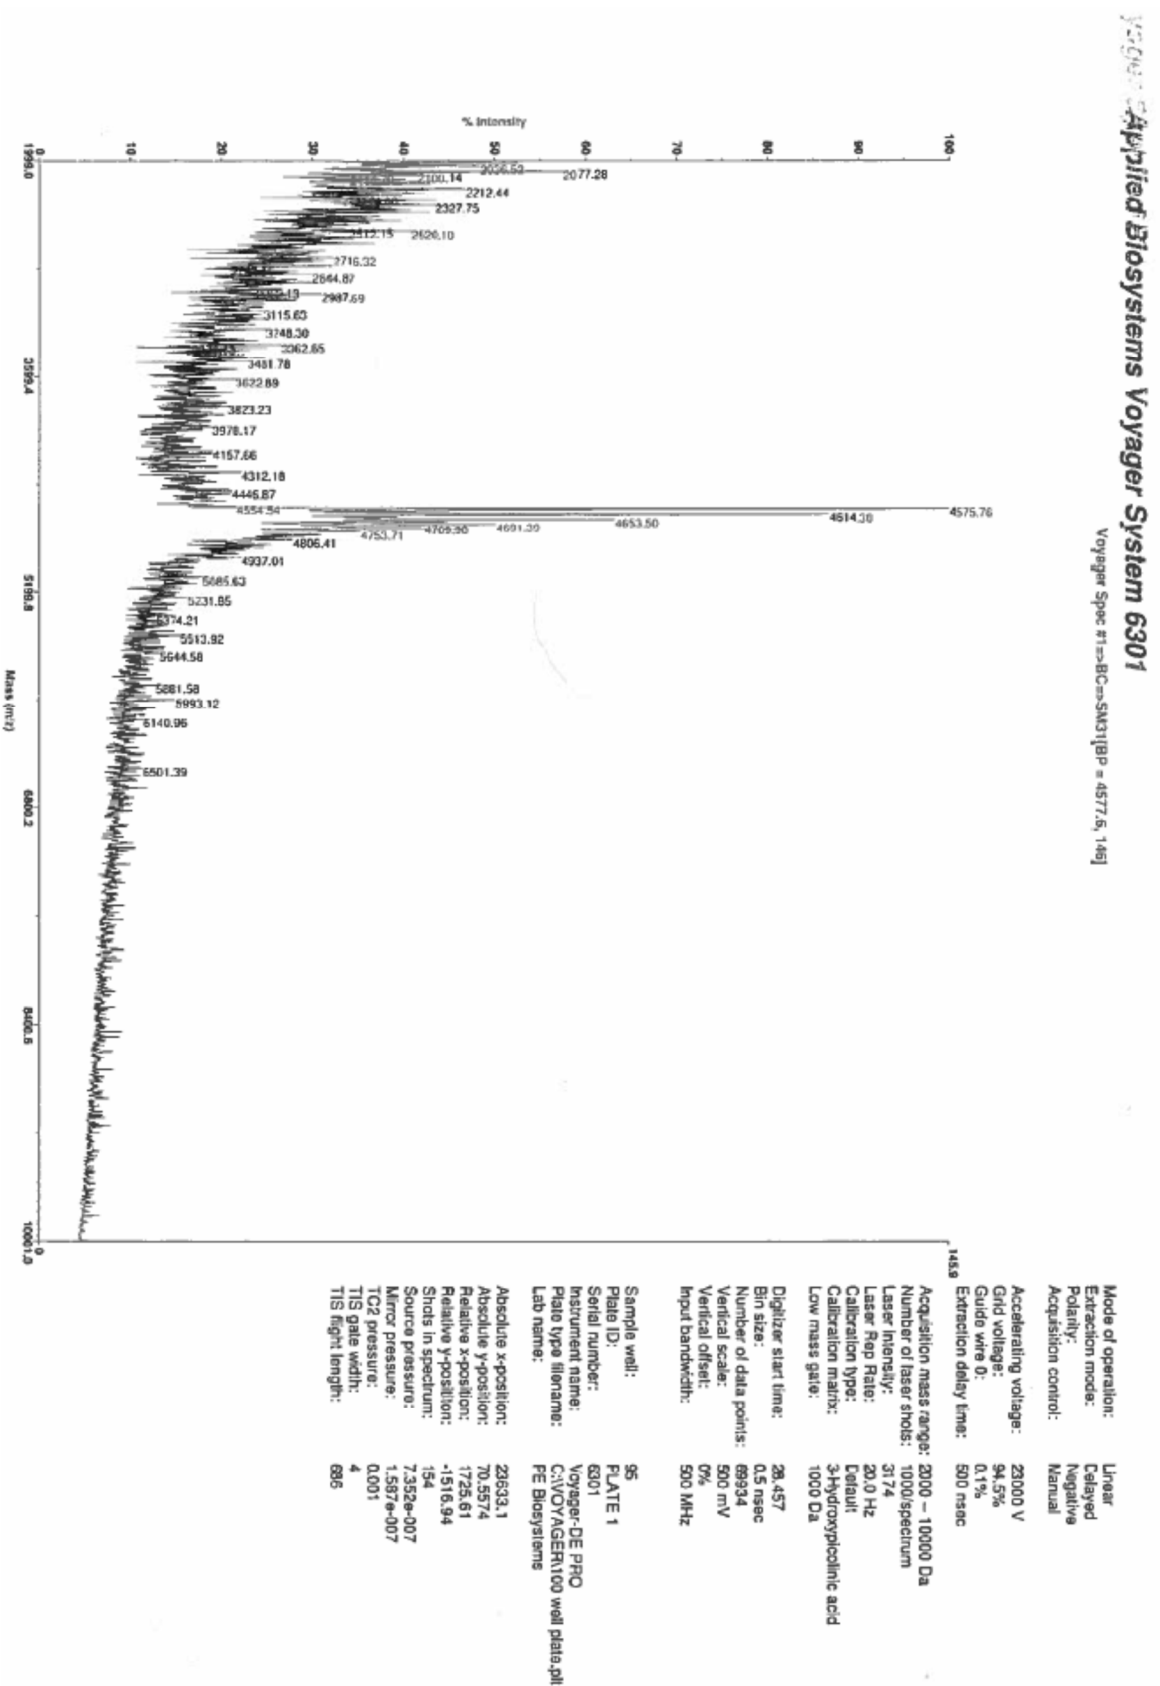

Figure S19: Mass Spec of oligomer B

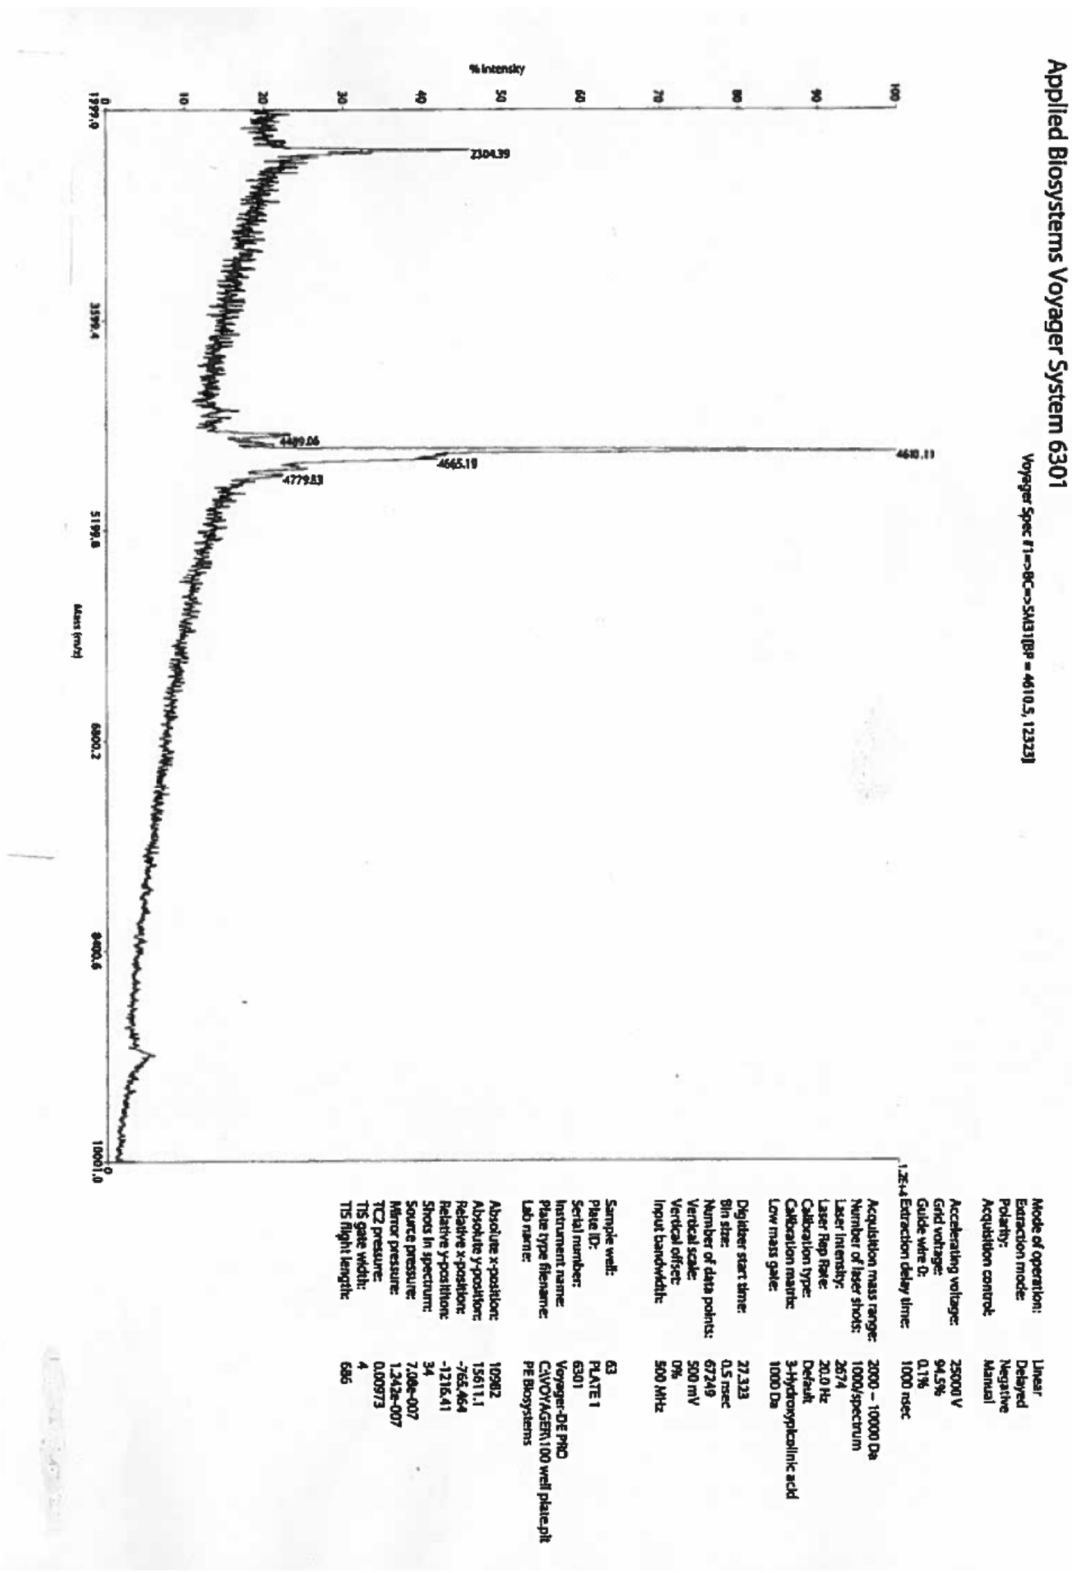

**Figure S20:** HPLC profile of oligomer A after Poli-Pak II purification

Sample Info : mm DNA5 50 ul, 5-20-20

Current Chromatogram(s)

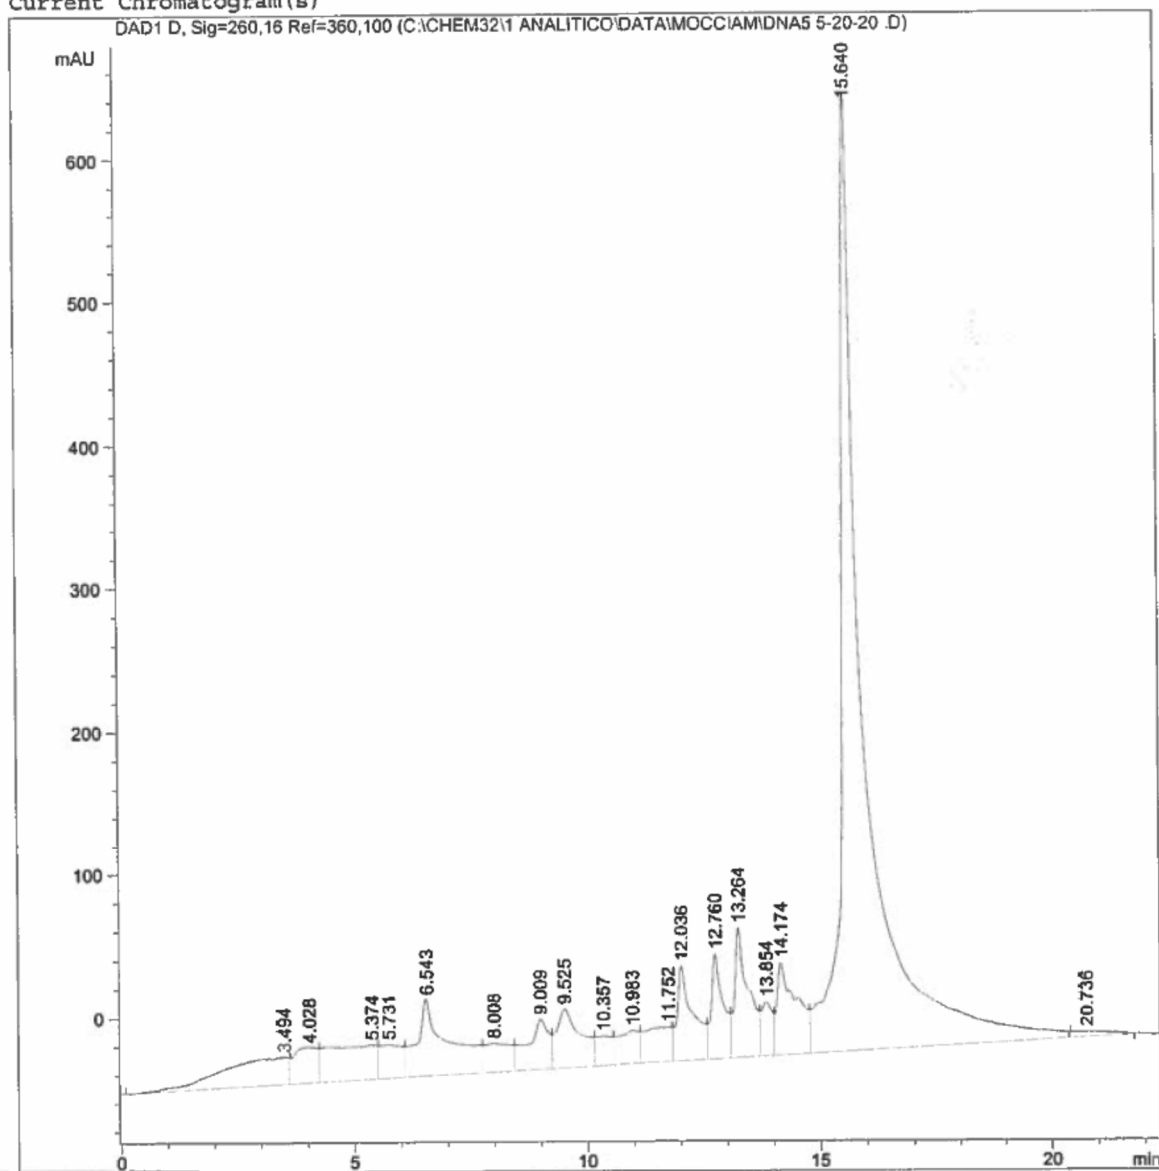

**Figure S21:** HPLC profile **oligomer B** after Poli-Pak II purification;

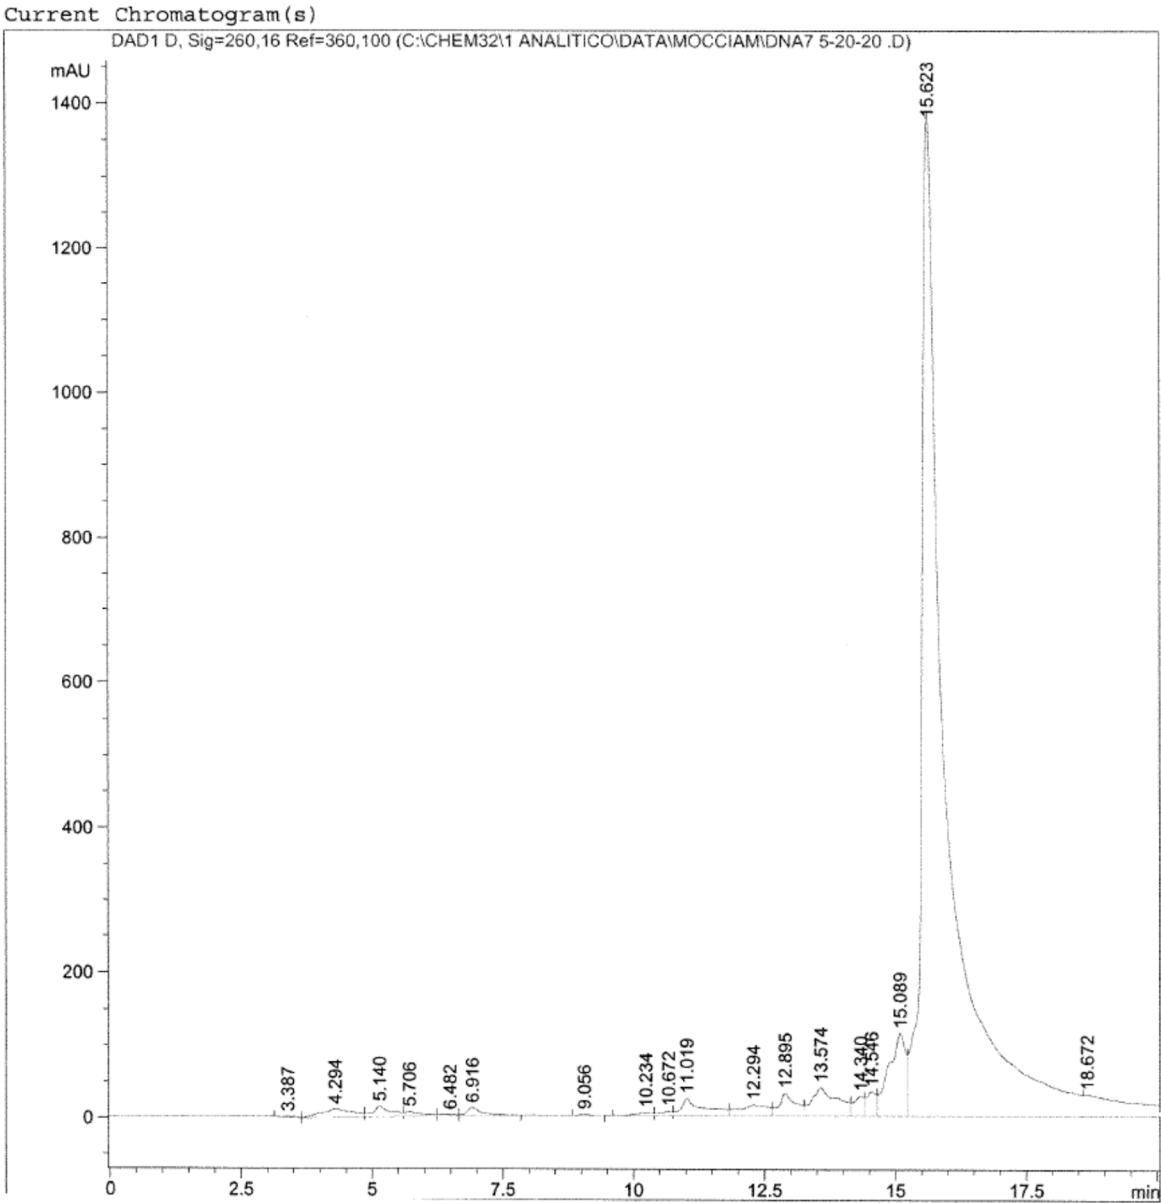

Supplement: s1 [file s1]
